# Supplementary material
Source: PubMed Central journal article supplement (PMC5388578)
Supplement: NIHMS839525-supplement-Supp_info.pdf [file NIHMS839525-supplement-Supp_info.pdf]

**Supporting Information for:**

**An operon for production of bioactive gibberellin A<sub>4</sub> phytohormone with wide distribution in the bacterial rice leaf streak pathogen *Xanthomonas oryzae* pv. *oryzicola***

Raimund Nagel; Paula CG Turrini; Ryan Nett; Jan E. Leach; Valérie Verdier; Marie-Anne van Sluys; Reuben J. Peters

Article acceptance date: 10 December 2016

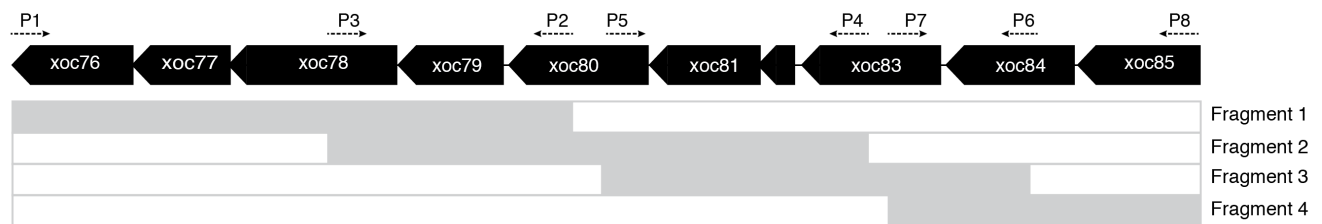

**Supporting Figure S1: Strategy used for PCR screening of Xoc isolates.** Genes comprising the GA biosynthetic operon are indicated in black blocks. Grey bars represent overlapping amplification products. Primers are indicated as dashed arrows (primer sequence can be found in Table S1).

**Supporting Table S1: Primers used in this study**

| Primer ID                                            | Primer sequence (5' to 3')     |                              | Product size (bp) |
|------------------------------------------------------|--------------------------------|------------------------------|-------------------|
|                                                      | Forward                        | Reverse                      |                   |
| <i>Cloning Xoc genes for heterologous expression</i> |                                |                              |                   |
| Xoc CYP117                                           | CACCATGGACGTGCTGCGCAACCC       | TCATGCGAAGCCGATATGGACGG      |                   |
| Xoc CYP114                                           | CACCATGGCCGTACAAGCAGCACACAG    | TCAGCCATCGTGCACCGCC          |                   |
| Xoc Fd <sub>GA</sub>                                 |                                | TCACATCGTCCCATCGTGGCC        |                   |
| Xoc SDR <sub>GA</sub>                                | CACCATGGGACGATGTGAAGGCAAAGTGG  | TCAGCGATCCACCCCGACG          |                   |
| Xoc CYP112                                           | CACCATGTCTAGACGATCCGTTGCCGATGC | TCACCAGCGAACC GGGAACG        |                   |
| Xoc CYP115                                           | CACCATGTGGCCTGAAAGCGATCATTGTG  | CTAGACGGCAGAAGGGCGAAAGGTGATC |                   |
| <i>GA biosynthetic operon screening</i>              |                                |                              |                   |
| Fragment 1                                           | TCCGCGAGGTAATACCTAATCCAGTG     | CCGCTGCTGCATTTCTC            | 4929              |
| Fragment 2                                           | CTGGCTCGAACACATTGATA           | ACCGTACTGGGAGGATTGA          | 5045              |
| Fragment 3                                           | GCGGGGCCGAAGTCC                | CGCCGCTGCCTTAGATGT           | 4146              |
| Fragment 4                                           | GCGTCCGGCGGCTCCTT              | GGTCCGGGCTAATCAGTTCT         | 3001              |

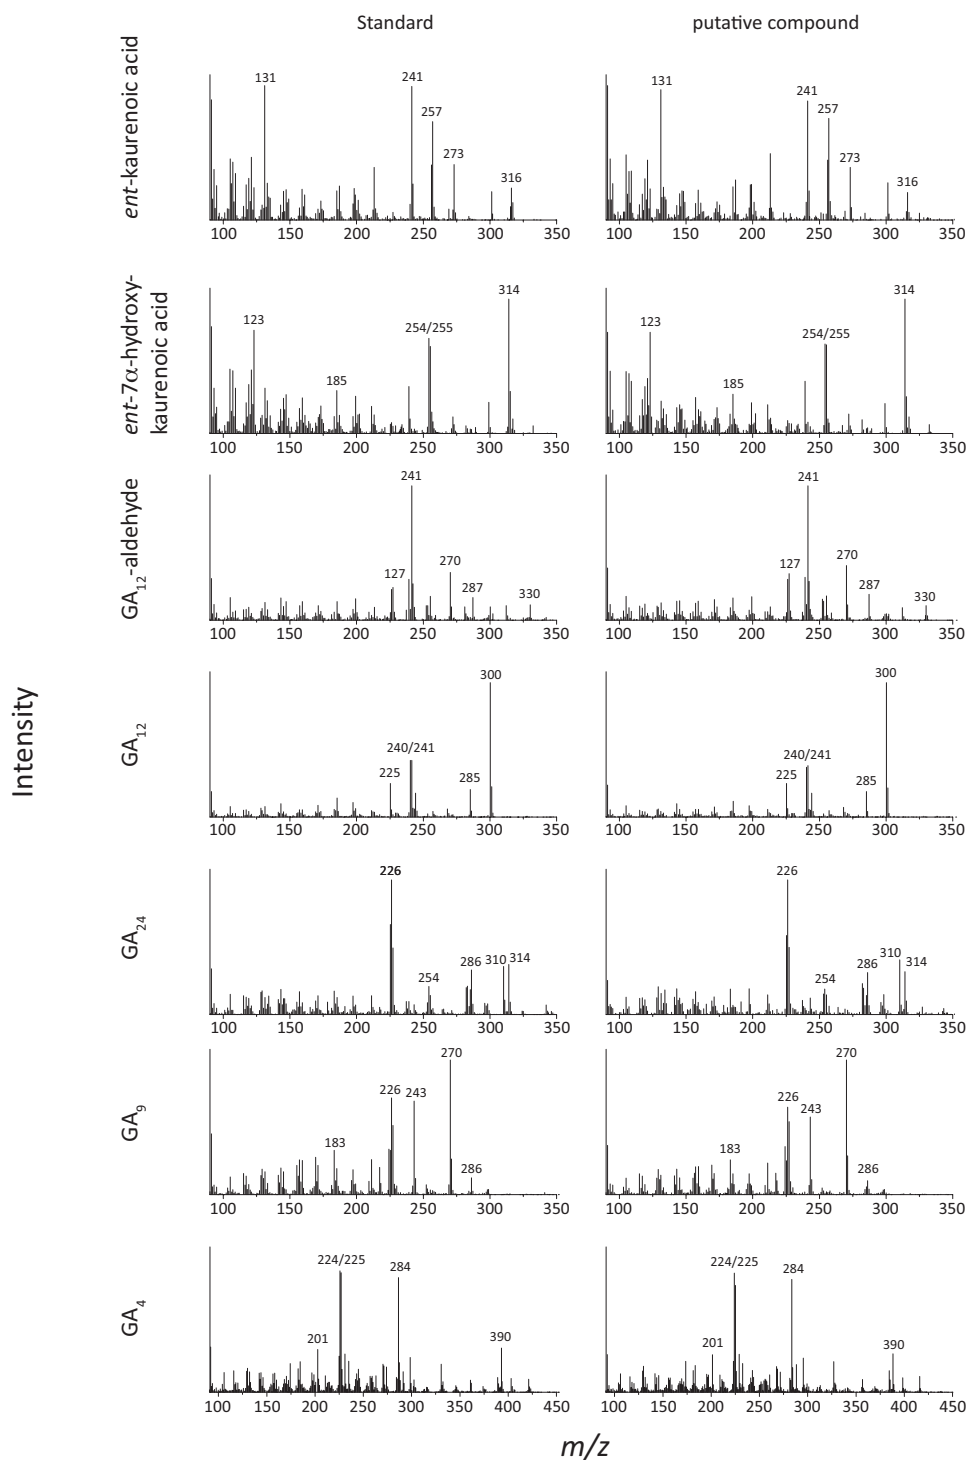

**Supporting Figure S2: Mass spectra of peaks from GC-chromatograms.** Mass spectra of peaks shown in Figure 2 and Supplemental Figure 2 were compared to the mass spectra of the corresponding authentic standards to confirm their identity.

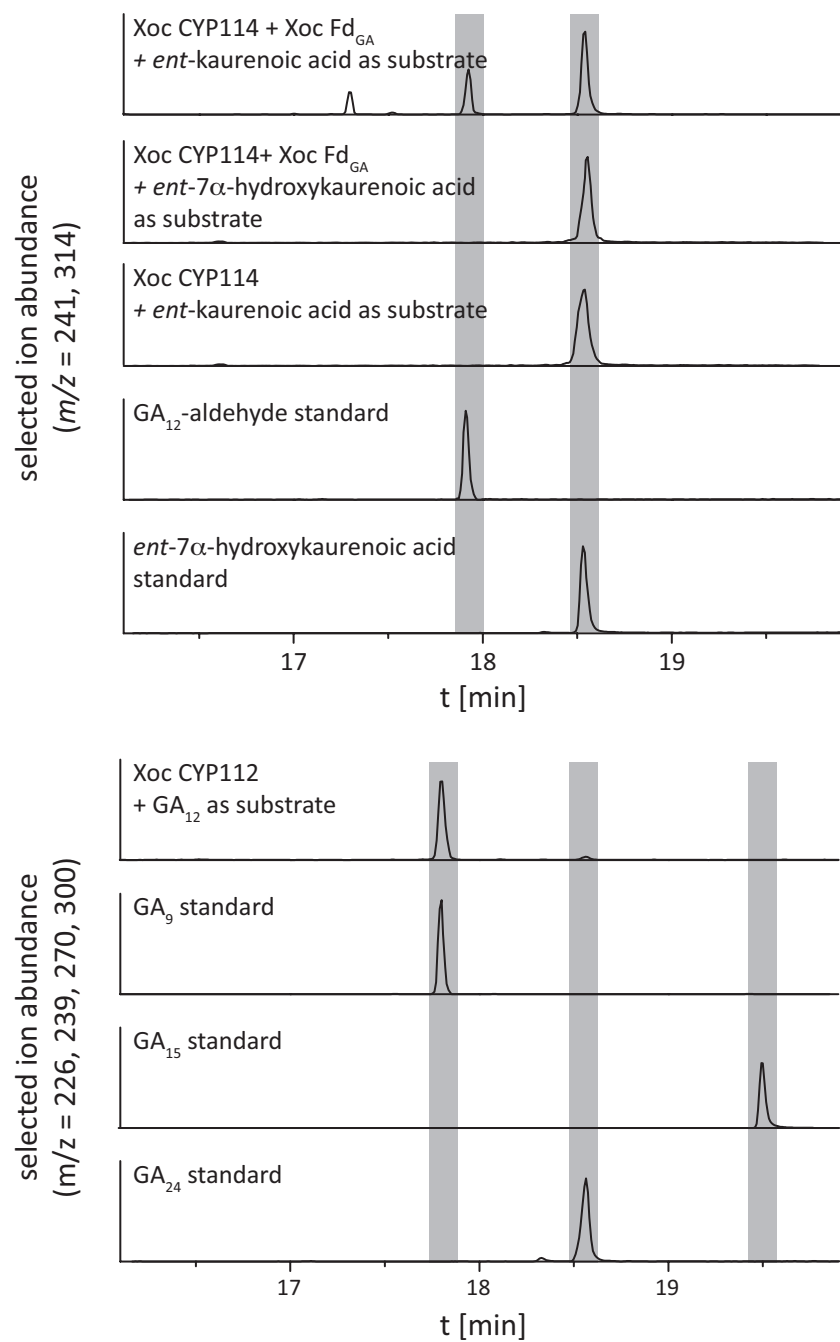

**Supporting Figure S3: Activity of recombinant XocCyp117, Cyp114+/-Fd<sub>GA</sub> and Cyp112.** GC-MS chromatograms of hexane extracts from *E. coli* cultures expressing the indicated enzymes and chromatograms of standard compounds as a reference. Just as with *B. japonicum* and *S. fredii* (Nett *et al.*, 2016), *ent*-7 $\alpha$ -hydroxykaurenoic acid is not further transformed by cultures co-expressing CYP114 and Fd<sub>GA</sub>.

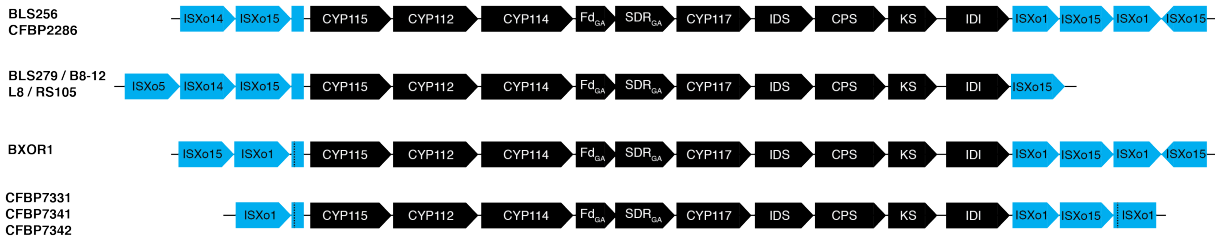

**Supporting Figure S4:** Insertional sequence (IS) elements flanking the GA biosynthetic operon in *Xoc* the indicated isolates.

**Supporting Table S2.** Isolates of *X. oryzae* pv. *oryzicola* screened for GA biosynthetic operon.

| <i>Xanthomonas</i><br>Isolate      | Year | Country | Town        | Province    | Host                      | XODB fragments |   |   |   |
|------------------------------------|------|---------|-------------|-------------|---------------------------|----------------|---|---|---|
|                                    |      |         |             |             |                           | 1              | 2 | 3 | 4 |
| <i>oryzae</i> pv. <i>oryzicola</i> |      |         |             |             |                           |                |   |   |   |
| MAI_03                             | 2003 | Mali    | O. du Niger | Niono       | <i>O. sativa</i>          |                |   |   |   |
| MAI_04                             | -    | Mali    | -           | -           | -                         |                |   |   |   |
| MAI_05                             |      | Mali    |             |             |                           |                |   |   |   |
| MAI_06                             | -    | Mali    | -           | -           | -                         |                |   |   |   |
| MAI_07                             | 2003 | Mali    | O. du Niger | Niono       | <i>O. sativa</i> Jamajigi |                |   |   |   |
| MAI_10 <sup>a</sup>                | 2003 | Mali    | O. du Niger | Niono       | <i>O. sativa</i>          |                |   |   |   |
| MAI_11                             | 2003 | Mali    | O. du Niger | Niono       | <i>O. sativa</i>          |                |   |   |   |
| MAI_16                             | 2009 | Mali    | O. du Niger | Molodo      | <i>O. sativa</i>          |                |   |   |   |
| MAI_18                             | 2009 | Mali    | O. du Niger | Kogoni      | <i>O. longistaminata</i>  |                |   |   |   |
| MAI_19                             | 2009 | Mali    | O. du Niger | Kogoni      | <i>O. longistaminata</i>  |                |   |   |   |
| MAI_20                             | 2009 | Mali    | O. du Niger | Kogoni      | <i>O. longistaminata</i>  |                |   |   |   |
| MAI_21                             | 2009 | Mali    | O. du Niger | Kogoni      | <i>O. longistaminata</i>  |                |   |   |   |
| MAI_22                             | 2009 | Mali    | O. du Niger | Kogoni      | <i>O. barthii</i>         |                |   |   |   |
| MAI_23                             | 2009 | Mali    | O. du Niger | Kogoni      | <i>O. barthii</i>         |                |   |   |   |
| MAI_24                             | 2009 | Mali    | O. du Niger | Kogoni      | <i>O. barthii</i>         |                |   |   |   |
| MAI_25                             | 2009 | Mali    | O. du Niger | Kogoni      | <i>O. longistaminata</i>  |                |   |   |   |
| MAI_26                             | 2009 | Mali    | O. du Niger | Macina      | <i>O. sativa</i>          |                |   |   |   |
| MAI_28                             | 2009 | Mali    | O. du Niger | Macina      | <i>O. sativa</i>          |                |   |   |   |
| MAI_29                             | 2009 | Mali    | O. du Niger | Macina      | <i>O. sativa</i>          |                |   |   |   |
| MAI_30                             | 2009 | Mali    | O. du Niger | Macina      | <i>O. sativa</i>          |                |   |   |   |
| MAI_31                             | 2009 | Mali    | O. du Niger | Macina      | <i>O. sativa</i>          |                |   |   |   |
| MAI_32                             | 2009 | Mali    | O. du Niger | Macina      | <i>O. sativa</i>          |                |   |   |   |
| MAI_33                             | 2009 | Mali    | O. du Niger | Macina      | <i>O. sativa</i>          |                |   |   |   |
| MAI_34                             | 2009 | Mali    | O. du Niger | Macina      | <i>O. sativa</i>          |                |   |   |   |
| MAI_35                             | 2009 | Mali    | O. du Niger | Macina      | <i>O. sativa</i>          |                |   |   |   |
| MAI_36                             | 2009 | Mali    | O. du Niger | Ndebougou   | <i>O. barthii</i>         |                |   |   |   |
| MAI_37                             | 2009 | Mali    | O. du Niger | Niono       | <i>O. sativa</i>          |                |   |   |   |
| MAI_38                             | 2009 | Mali    | Koulikoro   | Dialakoroba | <i>O. sativa</i>          |                |   |   |   |

|                     |      |             |              |              |                          |  |  |  |  |
|---------------------|------|-------------|--------------|--------------|--------------------------|--|--|--|--|
| MAI_39              | 2009 | Mali        | Sikasso      | Sélingué     | <i>O.sativa</i>          |  |  |  |  |
| MAI_40              | 2009 | Mali        | Sikasso      | Sélingué     | <i>O.sativa</i>          |  |  |  |  |
| MAI_41              | 2009 | Mali        | Sikasso      | Sélingué     | <i>O.sativa</i>          |  |  |  |  |
| MAI_42              | 2009 | Mali        | Sikasso      | Sélingué     | <i>O.sativa</i>          |  |  |  |  |
| MAI_43              | 2009 | Mali        | Sikasso      | Sélingué     | <i>O.sativa</i>          |  |  |  |  |
| MAI_44              | 2009 | Mali        | Sikasso      | Sélingué     | <i>O.sativa</i>          |  |  |  |  |
| MAI_46              | 2009 | Mali        | Koulikoro    | Baguineda    | <i>O.sativa</i>          |  |  |  |  |
| BAI_05 <sup>a</sup> | 2009 | B. Faso     | HautsBassins | Vallée       | <i>O.sativa</i>          |  |  |  |  |
| BAI_06              | 2009 | B. Faso     | HautsBassins | Vallée       | <i>O.sativa</i>          |  |  |  |  |
| BAI_07              | 2009 | B. Faso     | EastCenter   | Itenga       | <i>O.longistaminata</i>  |  |  |  |  |
| BAI_08              | 2009 | B. Faso     | EastCenter   | Itenga       | <i>O.longistaminata</i>  |  |  |  |  |
| BAI_09              | 2009 | B. Faso     | EastCenter   | Itenga       | <i>O.longistaminata</i>  |  |  |  |  |
| BAI_10              | 2009 | B. Faso     | EastCenter   | Itenga       | <i>O.longistaminata</i>  |  |  |  |  |
| BAI_11 <sup>a</sup> | 2009 | B. Faso     | EastCenter   | Itenga       | Wild rice                |  |  |  |  |
| BAI_12              | 2009 | B. Faso     | EastCenter   | Bagré        | <i>O.sativa</i>          |  |  |  |  |
| BAI_13              | 2009 | B. Faso     | EastCenter   | Bagré        | Weeds                    |  |  |  |  |
| BAI_14              | 2009 | B. Faso     | EastCenter   | Bagré        | <i>O.sativa</i>          |  |  |  |  |
| BAI_15              | 2009 | B. Faso     | EastCenter   | Bagré        | <i>O.sativa</i>          |  |  |  |  |
| BAI_16              | 2009 | B. Faso     | EastCenter   | Bagré        | <i>O.sativa</i>          |  |  |  |  |
| BAI_17              | 2009 | B. Faso     | EastCenter   | Bagré        | <i>Pennisetum</i> sp.    |  |  |  |  |
| BAI_18              | 2009 | B. Faso     | EastCenter   | Koulwooko    | <i>O.sativa</i>          |  |  |  |  |
| BAI_19              | 2009 | B. Faso     | Cascades     | Karfiguela   | <i>O.sativa</i>          |  |  |  |  |
| BAI_20              | 2009 | B. Faso     | Cascades     | Karfiguela   | Weeds                    |  |  |  |  |
| BAI_21              | 2009 | B. Faso     | Cascades     | Karfiguela   | <i>O.sativa</i>          |  |  |  |  |
| BAI_22              | 2009 | B. Faso     | Cascades     | Karfiguela   | <i>O.longistaminata</i>  |  |  |  |  |
| BAI_34              | 2009 | B. Faso     | Cascades     | Karfiguela   | <i>O.sativa</i>          |  |  |  |  |
| BAI_35              | 2010 | B. Faso     | Center       | Nabadougou   | <i>O.longistaminata</i>  |  |  |  |  |
| BAI_36              | 2010 | B. Faso     | B.Mouhoun    | Niassan      | <i>O.sativa</i>          |  |  |  |  |
| BAI_37              | 2010 | B. Faso     | EastCenter   | Bagré        | <i>O.sativa</i>          |  |  |  |  |
| BAI_38              | 2009 | B. Faso     | Cascades     | Karfiguela   | <i>O.sativa</i>          |  |  |  |  |
| BAI_39              | 2009 | B. Faso     | Cascades     | Karfiguela   | <i>O.sativa</i>          |  |  |  |  |
| BAI_40              | 2010 | B. Faso     | EastCenter   | Bagré        | <i>O.sativa</i>          |  |  |  |  |
| BAI_41              | 2010 | B. Faso     | Center       | Nabadougou   | <i>O.longistaminata</i>  |  |  |  |  |
| BAI_42              | 2010 | B. Faso     | EastCenter   | Bagré        | <i>O.sativa</i>          |  |  |  |  |
| BAI_43              | 2010 | B. Faso     | HautsBassins | Nienadonkele | <i>O.sativa</i>          |  |  |  |  |
| BAI_44              | 2010 | B. Faso     | HautsBassins | Nienadonkele | <i>O.sativa</i>          |  |  |  |  |
| BAI_49              | 2011 | B. Faso     | B. Mouhon    | Niassan      | <i>O. longistaminata</i> |  |  |  |  |
| BAI_60              | 2011 | B. Faso     | B. Mouhon    | Niassan      | <i>O. sativa</i>         |  |  |  |  |
| BAI_82              | 2011 | B. Faso     | Cascades     | Karfiguela   | <i>O. sativa</i>         |  |  |  |  |
| BLS_001             | 1978 | Philippines | Laguna       | College      | -                        |  |  |  |  |
| BLS_030             | 1978 | Philippines | Laguna       | College      | -                        |  |  |  |  |
| BLS_046             | 1980 | Philippines | Nueva Ecija  | MRRTC        | Peta                     |  |  |  |  |
| BLS_098             | 1982 | Philippines | Nueva Ecija  | Talavera     | IR52                     |  |  |  |  |
| BLS_099             | 1982 | Philippines | Bacolod      | Sum-Ag       | -                        |  |  |  |  |
| BLS_102             | 1982 | Philippines | Benguet      | Baguio       | -                        |  |  |  |  |
| BLS_103             | 1982 | Philippines | Benguet      | Baguio       | -                        |  |  |  |  |
| BLS_105             | 1982 | Philippines | Laguna       | College      | -                        |  |  |  |  |

|                                 |      |             |                              |                 |                  |   |  |  |  |  |
|---------------------------------|------|-------------|------------------------------|-----------------|------------------|---|--|--|--|--|
| BLS_106                         | 1982 | Philippines | Camarines Sur                |                 |                  | - |  |  |  |  |
| BLS_123                         | 1983 | Philippines | Laguna                       | College         |                  | - |  |  |  |  |
| BLS_125                         | 1983 | Philippines | Laguna                       | College         |                  | - |  |  |  |  |
| BLS_150                         | 1983 | Philippines | Laguna                       | College         |                  | - |  |  |  |  |
| BLS_159                         | 1983 | Philippines | Laguna                       | College         |                  | - |  |  |  |  |
| BLS_175                         | 1983 | Philippines | North Cotabato               |                 |                  | - |  |  |  |  |
| BLS_176                         | 1983 | Philippines | North Cotabato               |                 |                  | - |  |  |  |  |
| BLS_222                         | 1983 | Philippines | Laguna                       | College         |                  | - |  |  |  |  |
| BLS_256 <sup>a</sup>            | 1984 | Philippines | IRRI-IRTP                    | Los Baños       | IR29692-99-3-2-1 |   |  |  |  |  |
| BLS_276                         | 1984 | Philippines | Laguna                       | College         |                  | - |  |  |  |  |
| BLS_279 <sup>a</sup>            | 1984 | Philippines | Laguna                       | College         |                  | - |  |  |  |  |
| BLS_280                         | 1984 | Philippines | Laguna                       | College         |                  | - |  |  |  |  |
| BLS_281                         | 1984 | Philippines | IRRI                         | Los Baños       |                  | - |  |  |  |  |
| BLS_285                         | 1984 | Philippines | Laguna                       | College         |                  | - |  |  |  |  |
| BLS_289                         | 1984 | Philippines | Camarines Norte <sup>c</sup> |                 |                  | - |  |  |  |  |
| BLS_290                         | 1984 | Philippines | Leyte <sup>c</sup>           |                 |                  | - |  |  |  |  |
| BLS_291                         | 1985 | Philippines | Iloilo <sup>c</sup>          |                 |                  | - |  |  |  |  |
| BLS_294                         | 1984 | Philippines | Nueva Ecija <sup>c</sup>     |                 |                  | - |  |  |  |  |
| BLS_295                         | 1984 | Philippines | North Cotabato <sup>c</sup>  |                 |                  | - |  |  |  |  |
| BLS_303                         | 1985 | Philippines | Iloilo                       | San Dionisio    | C732-14(upland)  |   |  |  |  |  |
| BLS_305                         | 1985 | Philippines | Iloilo                       | San Dionisio    | C894-21          |   |  |  |  |  |
| BLS_348                         | 1988 | Philippines | Cagayan                      | Alilino         |                  | - |  |  |  |  |
| BLS_354 <sup>b</sup>            | 1983 | Philippines | Isabela                      | Cabatuan        |                  | - |  |  |  |  |
| BLS_356                         | 1988 | Philippines | Isabela                      | San Fabian      | IR68             |   |  |  |  |  |
| BLS_357                         | 1988 | Philippines | Isabela                      | San Manuel      |                  | - |  |  |  |  |
| BLS_365                         | 1988 | Philippines | Isabela                      | Burgos          |                  | - |  |  |  |  |
| BLS_372                         | 1989 | Philippines | Nueva Ecija                  | CLSU, Muñoz     | C4               |   |  |  |  |  |
| BLS_377                         | 1989 | Philippines | Nueva Ecija                  | Guimba          |                  | - |  |  |  |  |
| BLS_391                         | 1989 | Philippines | Nueva Ecija                  | Bagsak, Calinan |                  | - |  |  |  |  |
| BLS_413                         | 1990 | Philippines | Tarlac                       | La Paz          | O. sativa IR72   |   |  |  |  |  |
| BLS_415                         | 1990 | Philippines | Tarlac                       | La Paz          | O. sativa IR72   |   |  |  |  |  |
| BLS_417                         | 1990 | Philippines | Tarlac                       | La Paz          | O. sativa IR72   |   |  |  |  |  |
| BLS_420                         | 1990 | Philippines | Tarlac                       | La Paz          | O. sativa IR72   |   |  |  |  |  |
| RS105 <sup>a</sup>              | 1992 | China       |                              |                 |                  |   |  |  |  |  |
| B8-12 <sup>a</sup>              | 2007 | China       |                              |                 |                  |   |  |  |  |  |
| L8 <sup>a</sup>                 | <    | China       |                              |                 |                  |   |  |  |  |  |
| Xoc China                       | 1990 | China       | -                            | -               |                  | - |  |  |  |  |
| CFBP2286 <sup>a</sup>           | 1964 | Malaysia    | na                           | na              | O. sativa        |   |  |  |  |  |
| CFBP2287                        | -    | Malaysia    | -                            | -               |                  | - |  |  |  |  |
| UPB497                          |      | Malaysia    | -                            | -               |                  | - |  |  |  |  |
| BXOR1 <sup>a</sup>              | 1996 | India       |                              |                 |                  |   |  |  |  |  |
| <i>oryzae</i> pv. <i>oryzae</i> |      |             |                              |                 |                  |   |  |  |  |  |
| BAI3                            | 2003 | Burkina     | East center                  | Bagre           |                  |   |  |  |  |  |
| MAFF311018                      | na   | Japan       |                              |                 |                  |   |  |  |  |  |
| 37012                           | 2003 | Mali        |                              | Niono           |                  |   |  |  |  |  |
| PXO113                          | -    | Philippines |                              |                 |                  |   |  |  |  |  |

|                                       |      |             |             |            |       |  |  |  |  |
|---------------------------------------|------|-------------|-------------|------------|-------|--|--|--|--|
| Thai Xoo12                            | -    | Thailand    |             |            |       |  |  |  |  |
| KACC10331 <sup>a</sup>                |      | Korea       |             |            |       |  |  |  |  |
| PXO99A <sup>a</sup>                   | 1980 | Philippines |             |            |       |  |  |  |  |
| PXO86 <sup>a</sup>                    | 1977 | Philippines |             |            |       |  |  |  |  |
| PXO282 <sup>a</sup>                   | 1990 | Philippines |             |            |       |  |  |  |  |
| PXO83 <sup>a</sup>                    | 1976 | Philippines | Nueva Ecija |            |       |  |  |  |  |
| AXO1947 <sup>a</sup>                  | 2015 | Cameroon    |             |            |       |  |  |  |  |
| PXO602 <sup>a</sup>                   | 2006 | Philippines |             |            |       |  |  |  |  |
| PXO71 <sup>a</sup>                    | 1974 | Philippines |             |            |       |  |  |  |  |
| PXO236 <sup>a</sup>                   | 1989 | Philippines |             |            |       |  |  |  |  |
| PXO145 <sup>a</sup>                   | 1982 | Philippines |             |            |       |  |  |  |  |
| PXO211 <sup>a</sup>                   | 1989 | Philippines |             |            |       |  |  |  |  |
| PXO524 <sup>a</sup>                   | 1994 | Philippines |             |            |       |  |  |  |  |
| PXO563 <sup>a</sup>                   | 1998 | Philippines |             |            |       |  |  |  |  |
| <i>campestris</i> pv. <i>leersiae</i> |      |             |             |            |       |  |  |  |  |
| BAI23                                 | 2009 | Burkina     | Cascades    | Karfiguela | Weeds |  |  |  |  |
| <i>oryzae</i>                         |      |             |             |            |       |  |  |  |  |
| US-X8-1A                              |      | USA         | Lousiana    |            | Rice  |  |  |  |  |

<sup>a</sup> Genome published

<sup>b</sup> Genome sequenced (personal communication A. Bogdanove)

<sup>c</sup> Town of collection unknown

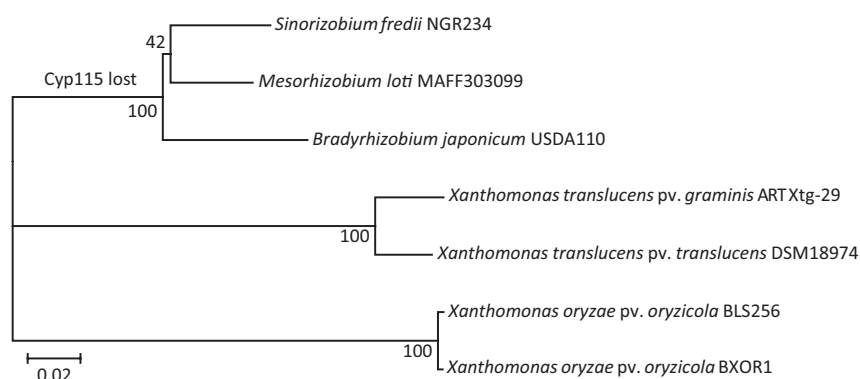

**Supporting Figure S5: Phylogeny of the GA biosynthetic operon.** Unrooted Maximum likelihood phylogenetic tree of the concatenated amino acid sequence spanning CYP112 to KS, which includes the proteins found in all examples of the GA biosynthetic operon (the scale bar represents substitutions per site). These sequences were aligned in MEGA 7 using the Muscle algorithm, the phylogenetic tree was constructed and tested with the bootstrap method (1,000 replicate runs) in the same program using the Maximum likelihood algorithm with the JTT model and gamma distribution including all sites.

#### Reference:

Nett RS, Montanares M, Marcassa A, Lu X, Nagel R, Charles TC, Hedden P, Rojas MC, Peters RJ. 2016. Elucidation of gibberellin biosynthesis in bacteria reveals convergent evolution. *Nat Chem Biol*. DOI:10.1038/nchembio.2232
